# Supplementary material for: Enhancement of a modified Mediterranean-style, low glycemic load diet with specific phytochemicals improves cardiometabolic risk factors in subjects with metabolic syndrome and hypercholesterolemia in a randomized trial
Source: PubMed Central journal article supplement (PMC2588603; doi:10.1186/1743-7075-5-29), 2008-11-04
Supplement: 1743-7075-5-29-S2.pdf [file 1743-7075-5-29-S2.pdf]

**Additional file 2: Macronutrient profile of the soy and phytosterol-based powdered beverage<sup>1</sup>**

| <b>Nutrient</b>                                                                                                                                           | <b>Amount per serving</b> | <b>Recommended Daily Intake (%)</b> |
|-----------------------------------------------------------------------------------------------------------------------------------------------------------|---------------------------|-------------------------------------|
| Total Fat                                                                                                                                                 | 2 g                       | 3                                   |
| Cholesterol                                                                                                                                               | 0 mg                      | 0                                   |
| Total Carbohydrate                                                                                                                                        | 24g                       | 8                                   |
| Dietary Fiber                                                                                                                                             | 4 g                       | 16                                  |
| Soy Protein                                                                                                                                               | 15 g                      | 30                                  |
| Phytosterols <sup>2</sup><br>( $\beta$ -sitosterol 40-58%;<br>campesterol 20-30%;<br>stigmasterol 14-22%;<br>brassicasterol 0-6%;<br>and sitostanol 0-5%) | 2 g                       |                                     |

<sup>1</sup>Calories per serving, 160; <sup>2</sup>Recommended daily intake not established.
